# Supplementary material for: Prediction of Banks Efficiency Using Feature Selection Method: Comparison between Selected Machine Learning Models
Source: Hindawi journal article supplement (doi:10.1155/2022/3374489), 2022-01-01
Supplement: f1 [file 3374489.f1.docx]

| Supplementary Table 1. Correlations - Conventional Banks’ efficiency | | | | | | | | | | | | | | | | | | | |
| --- | --- | --- | --- | --- | --- | --- | --- | --- | --- | --- | --- | --- | --- | --- | --- | --- | --- | --- | --- |
|  | | **Car Total** | **Car T1** | **LL-TL** | **LL-TE** | **Profit Emp** | **Business Emp** | **Earnings Growth** | **ROA** | **ROE** | **NII/TA** | **NII/NR** | **LTD** | **IID/TD** | **BOOK SHARE** | **EPS GAAP** | **TOTAL DEP** | **NON II/TA** | **EFFICIENCY RATIO** |
| Car Total | **Pearson Cor** | 1 | .932** | .248 | -.204 | .524** | .523** | -.054 | .318 | -.261 | .396* | -.142 | -.201 | .195 | .454** | .246 | .092 | -.467** | -.467** |
| **Sig. (2-tailed)** |  | .000 | .151 | .239 | .001 | .001 | .760 | .063 | .130 | .019 | .415 | .248 | .263 | .006 | .155 | .598 | .005 | .005 |
| Car T1 | **Pearson Cor** | .932** | 1 | .186 | -.290 | .719** | .718** | -.032 | .485** | -.182 | .369* | -.398* | -.387* | .288 | .432** | .253 | .131 | -.259 | -.692** |
| **Sig. (2-tailed)** | .000 |  | .285 | .091 | .000 | .000 | .856 | .003 | .295 | .029 | .018 | .022 | .094 | .009 | .142 | .454 | .133 | .000 |
| LL/TL | **Pearson Cor** | .248 | .186 | 1 | .867** | -.217 | -.220 | .051 | .289 | .222 | .413* | .413* | .081 | .262 | .443** | .546** | .161 | -.084 | -.018 |
| **Sig. (2-tailed)** | .151 | .285 |  | .000 | .211 | .204 | .772 | .092 | .200 | .014 | .014 | .644 | .128 | .008 | .001 | .354 | .631 | .919 |
| LL/TE | **Pearson Cor** | -.204 | -.290 | .867** | 1 | -.526** | -.530** | .029 | .011 | .309 | .222 | .596** | .246 | .122 | .215 | .415* | .121 | -.004 | .318 |
| **Sig. (2-tailed)** | .239 | .091 | .000 |  | .001 | .001 | .868 | .952 | .071 | .200 | .000 | .155 | .484 | .216 | .013 | .490 | .981 | .063 |
| Profit/Emp | **Pearson Cor** | .524** | .719** | -.217 | -.526** | 1 | .999** | -.026 | .405* | -.073 | -.017 | -.858** | -.640** | .210 | .273 | .125 | .031 | -.104 | -.808** |
| **Sig. (2-tailed)** | .001 | .000 | .211 | .001 |  | .000 | .884 | .016 | .677 | .925 | .000 | .000 | .227 | .112 | .475 | .859 | .552 | .000 |
| Business/Emp | **Pearson Cor** | .523** | .718** | -.220 | -.530** | .999** | 1 | -.029 | .401* | -.077 | -.012 | -.859** | -.641** | .210 | .275 | .123 | .031 | -.107 | -.808** |
| **Sig. (2-tailed)** | .001 | .000 | .204 | .001 | .000 |  | .867 | .017 | .660 | .947 | .000 | .000 | .227 | .109 | .483 | .859 | .540 | .000 |
| Earnings Growth | **Pearson Cor** | -.054 | -.032 | .051 | .029 | -.026 | -.029 | 1 | .379* | .353* | .137 | .033 | -.122 | .227 | -.016 | .210 | .020 | .096 | -.169 |
| **Sig. (2-tailed)** | .760 | .856 | .772 | .868 | .884 | .867 |  | .025 | .038 | .433 | .849 | .485 | .189 | .928 | .226 | .908 | .585 | .332 |
| ROA | **Pearson Cor** | .318 | .485** | .289 | .011 | .405* | .401* | .379* | 1 | .658** | .420* | -.390* | -.529** | .700** | .267 | .644** | .469** | .444** | -.719** |
| **Sig. (2-tailed)** | .063 | .003 | .092 | .952 | .016 | .017 | .025 |  | .000 | .012 | .021 | .001 | .000 | .120 | .000 | .004 | .008 | .000 |
| ROE | **Pearson Cor** | -.261 | -.182 | .222 | .309 | -.073 | -.077 | .353* | .658** | 1 | .275 | -.032 | -.478** | .669** | .028 | .676** | .669** | .446** | -.147 |
| **Sig. (2-tailed)** | .130 | .295 | .200 | .071 | .677 | .660 | .038 | .000 |  | .110 | .855 | .004 | .000 | .873 | .000 | .000 | .007 | .400 |
| NII/TA | **Pearson Cor** | .396* | .369* | .413* | .222 | -.017 | -.012 | .137 | .420* | .275 | 1 | .286 | -.185 | .518** | .120 | .341* | .545** | -.013 | -.184 |
| **Sig. (2-tailed)** | .019 | .029 | .014 | .200 | .925 | .947 | .433 | .012 | .110 |  | .096 | .287 | .001 | .494 | .045 | .001 | .939 | .291 |
| NII/NR | **Pearson Cor** | -.142 | -.398* | .413* | .596** | -.858** | -.859** | .033 | -.390* | -.032 | .286 | 1 | .625** | -.119 | -.143 | -.030 | .072 | -.276 | .764** |
| **Sig. (2-tailed)** | .415 | .018 | .014 | .000 | .000 | .000 | .849 | .021 | .855 | .096 |  | .000 | .495 | .412 | .863 | .679 | .109 | .000 |
| LTD | **Pearson Cor** | -.201 | -.387* | .081 | .246 | -.640** | -.641** | -.122 | -.529** | -.478** | -.185 | .625** | 1 | -.447** | -.283 | -.437** | -.456** | -.075 | .579** |
| **Sig. (2-tailed)** | .248 | .022 | .644 | .155 | .000 | .000 | .485 | .001 | .004 | .287 | .000 |  | .007 | .100 | .009 | .006 | .667 | .000 |
| IID/TD | **Pearson Cor** | .195 | .288 | .262 | .122 | .210 | .210 | .227 | .700** | .669** | .518** | -.119 | -.447** | 1 | .199 | .661** | .835** | .342* | -.389* |
| **Sig. (2-tailed)** | .263 | .094 | .128 | .484 | .227 | .227 | .189 | .000 | .000 | .001 | .495 | .007 |  | .251 | .000 | .000 | .044 | .021 |
| BOOK SHARE | **Pearson Cor** | .454** | .432** | .443** | .215 | .273 | .275 | -.016 | .267 | .028 | .120 | -.143 | -.283 | .199 | 1 | .710** | -.020 | -.269 | -.410* |
| **Sig. (2-tailed)** | .006 | .009 | .008 | .216 | .112 | .109 | .928 | .120 | .873 | .494 | .412 | .100 | .251 |  | .000 | .908 | .118 | .014 |
| EPS/GAAP | **Pearson Cor** | .246 | .253 | .546** | .415* | .125 | .123 | .210 | .644** | .676** | .341* | -.030 | -.437** | .661** | .710** | 1 | .522** | .048 | -.348* |
| **Sig. (2-tailed)** | .155 | .142 | .001 | .013 | .475 | .483 | .226 | .000 | .000 | .045 | .863 | .009 | .000 | .000 |  | .001 | .786 | .040 |
| TOTAL DEPOSITS | **Pearson Cor** | .092 | .131 | .161 | .121 | .031 | .031 | .020 | .469** | .669** | .545** | .072 | -.456** | .835** | -.020 | .522** | 1 | .231 | -.057 |
| **Sig. (2-tailed)** | .598 | .454 | .354 | .490 | .859 | .859 | .908 | .004 | .000 | .001 | .679 | .006 | .000 | .908 | .001 |  | .182 | .744 |
| NON II/TA | **Pearson Cor** | -.467** | -.259 | -.084 | -.004 | -.104 | -.107 | .096 | .444** | .446** | -.013 | -.276 | -.075 | .342* | -.269 | .048 | .231 | 1 | -.237 |
| **Sig. (2-tailed)** | .005 | .133 | .631 | .981 | .552 | .540 | .585 | .008 | .007 | .939 | .109 | .667 | .044 | .118 | .786 | .182 |  | .170 |
| EFFICIENCY RATIO | **Pearson Cor** | -.467** | -.692** | -.018 | .318 | -.808** | -.808** | -.169 | -.719** | -.147 | -.184 | .764** | .579** | -.389* | -.410* | -.348* | -.057 | -.237 | 1 |
| **Sig. (2-tailed)** | .005 | .000 | .919 | .063 | .000 | .000 | .332 | .000 | .400 | .291 | .000 | .000 | .021 | .014 | .040 | .744 | .170 |  |

| Supplementary Table 2. Correlations - Islamic Banks’ efficiency | | | | | | | | | | | | | | | | | | | | | |
| --- | --- | --- | --- | --- | --- | --- | --- | --- | --- | --- | --- | --- | --- | --- | --- | --- | --- | --- | --- | --- | --- |
|  | | | | **Car Total** | **Car T1** | **LL-TL** | **LL-TE** | **Profit Emp** | **Business Emp** | **Earnings Growth** | **ROA** | **ROE** | **NII/TA** | **NII/NR** | **LTD** | **IID/TD** | **BOOK SHARE** | **EPS GAAP** | **TOTAL DEP** | **NON II/TA** | **EFFICIENCY RATIO** |
| Car Total | | **Pearson Cor** | | 1.000 | .894** | -0.226 | -.461* | 0.400 | 0.365 | -0.070 | 0.186 | -0.307 | .475* | .555* | -0.255 | 0.268 | 0.414 | 0.107 | 0.220 | -.460* | -0.398 |
| **Sig. (2-tailed)** | |  | 0.000 | 0.339 | 0.041 | 0.080 | 0.114 | 0.768 | 0.432 | 0.188 | 0.034 | 0.011 | 0.278 | 0.253 | 0.070 | 0.653 | 0.352 | 0.041 | 0.082 |
| Car T1 | | **Pearson Cor** | | .894** | 1.000 | -0.334 | -.579** | .638** | .542* | 0.015 | 0.409 | -0.201 | 0.440 | .687** | -0.400 | 0.413 | .488* | 0.219 | 0.412 | -.581** | -.597** |
| **Sig. (2-tailed)** | | 0.000 |  | 0.150 | 0.008 | 0.002 | 0.014 | 0.949 | 0.074 | 0.395 | 0.052 | 0.001 | 0.081 | 0.070 | 0.029 | 0.354 | 0.071 | 0.007 | 0.005 |
| LL/TL | | **Pearson Cor** | | -0.226 | -0.334 | 1.000 | .935** | -.466* | -.627** | -0.177 | 0.409 | .689** | 0.266 | -.548* | -0.271 | 0.301 | 0.152 | .481* | 0.404 | .738** | -0.173 |
| **Sig. (2-tailed)** | | 0.339 | 0.150 |  | 0.000 | 0.039 | 0.003 | 0.455 | 0.074 | 0.001 | 0.256 | 0.012 | 0.248 | 0.198 | 0.522 | 0.032 | 0.077 | 0.000 | 0.466 |
| LL/TE | | **Pearson Cor** | | -.461* | -.579** | .935** | 1.000 | -.586** | -.683** | -0.147 | 0.204 | .614** | 0.123 | -.636** | -0.145 | 0.160 | -0.051 | 0.315 | 0.218 | .774** | 0.008 |
| **Sig. (2-tailed)** | | 0.041 | 0.008 | 0.000 |  | 0.007 | 0.001 | 0.535 | 0.389 | 0.004 | 0.607 | 0.003 | 0.541 | 0.500 | 0.831 | 0.176 | 0.355 | 0.000 | 0.973 |
| Profit/Emp | | **Pearson Cor** | | 0.400 | .638** | -.466* | -.586** | 1.000 | .930** | 0.281 | .494* | -0.015 | 0.425 | .878** | -0.281 | 0.292 | .497* | 0.323 | 0.423 | -.779** | -.632** |
| **Sig. (2-tailed)** | | 0.080 | 0.002 | 0.039 | 0.007 |  | 0.000 | 0.230 | 0.027 | 0.952 | 0.062 | 0.000 | 0.229 | 0.212 | 0.026 | 0.165 | 0.063 | 0.000 | 0.003 |
| Business/Emp | | **Pearson Cor** | | 0.365 | .542* | -.627** | -.683** | .930** | 1.000 | 0.152 | 0.177 | -0.304 | 0.255 | .879** | -0.154 | 0.137 | 0.336 | 0.063 | 0.193 | -.847** | -.498* |
| **Sig. (2-tailed)** | | 0.114 | 0.014 | 0.003 | 0.001 | 0.000 |  | 0.523 | 0.457 | 0.192 | 0.278 | 0.000 | 0.517 | 0.564 | 0.147 | 0.791 | 0.415 | 0.000 | 0.025 |
| Earnings Growth | | **Pearson Cor** | | -0.070 | 0.015 | -0.177 | -0.147 | 0.281 | 0.152 | 1.000 | 0.228 | 0.316 | 0.293 | 0.156 | 0.089 | -0.054 | -0.037 | 0.100 | -0.119 | -0.143 | 0.131 |
| **Sig. (2-tailed)** | | 0.768 | 0.949 | 0.455 | 0.535 | 0.230 | 0.523 |  | 0.334 | 0.175 | 0.210 | 0.511 | 0.710 | 0.821 | 0.876 | 0.674 | 0.617 | 0.548 | 0.582 |
| ROA | | **Pearson Cor** | | 0.186 | 0.409 | 0.409 | 0.204 | .494* | 0.177 | 0.228 | 1.000 | .751** | .640** | 0.290 | -.535* | .590** | .663** | .841** | .863** | -0.031 | -.743** |
| **Sig. (2-tailed)** | | 0.432 | 0.074 | 0.074 | 0.389 | 0.027 | 0.457 | 0.334 |  | 0.000 | 0.002 | 0.215 | 0.015 | 0.006 | 0.001 | 0.000 | 0.000 | 0.898 | 0.000 |
| ROE | | **Pearson Cor** | | -0.307 | -0.201 | .689** | .614** | -0.015 | -0.304 | 0.316 | .751** | 1.000 | 0.433 | -0.168 | -0.106 | 0.170 | .460* | .812** | .611** | 0.347 | -0.311 |
| **Sig. (2-tailed)** | | 0.188 | 0.395 | 0.001 | 0.004 | 0.952 | 0.192 | 0.175 | 0.000 |  | 0.057 | 0.478 | 0.658 | 0.474 | 0.041 | 0.000 | 0.004 | 0.133 | 0.182 |
| NII/TA | | **Pearson Cor** | | .475* | 0.440 | 0.266 | 0.123 | 0.425 | 0.255 | 0.293 | .640** | 0.433 | 1.000 | 0.436 | -0.342 | 0.378 | .643** | .678** | .595** | -0.187 | -.614** |
| **Sig. (2-tailed)** | | 0.034 | 0.052 | 0.256 | 0.607 | 0.062 | 0.278 | 0.210 | 0.002 | 0.057 |  | 0.055 | 0.140 | 0.100 | 0.002 | 0.001 | 0.006 | 0.431 | 0.004 |
| NII/NR | | **Pearson Cor** | | .555* | .687** | -.548* | -.636** | .878** | .879** | 0.156 | 0.290 | -0.168 | 0.436 | 1.000 | -0.059 | 0.064 | .594** | 0.305 | 0.369 | -.946** | -.586** |
| **Sig. (2-tailed)** | | 0.011 | 0.001 | 0.012 | 0.003 | 0.000 | 0.000 | 0.511 | 0.215 | 0.478 | 0.055 |  | 0.805 | 0.789 | 0.006 | 0.190 | 0.109 | 0.000 | 0.007 |
| LTD | | **Pearson Cor** | | -0.255 | -0.400 | -0.271 | -0.145 | -0.281 | -0.154 | 0.089 | -.535* | -0.106 | -0.342 | -0.059 | 1.000 | -.996** | -0.084 | -0.156 | -.512* | -0.189 | .620** |
| **Sig. (2-tailed)** | | 0.278 | 0.081 | 0.248 | 0.541 | 0.229 | 0.517 | 0.710 | 0.015 | 0.658 | 0.140 | 0.805 |  | 0.000 | 0.725 | 0.510 | 0.021 | 0.426 | 0.004 |
| IID/TD | | **Pearson Cor** | | 0.268 | 0.413 | 0.301 | 0.160 | 0.292 | 0.137 | -0.054 | .590** | 0.170 | 0.378 | 0.064 | -.996** | 1.000 | 0.131 | 0.216 | .550* | 0.194 | -.633** |
| **Sig. (2-tailed)** | | 0.253 | 0.070 | 0.198 | 0.500 | 0.212 | 0.564 | 0.821 | 0.006 | 0.474 | 0.100 | 0.789 | 0.000 |  | 0.583 | 0.361 | 0.012 | 0.412 | 0.003 |
| BOOK SHARE | | **Pearson Cor** | | 0.414 | .488* | 0.152 | -0.051 | .497* | 0.336 | -0.037 | .663** | .460* | .643** | .594** | -0.084 | 0.131 | 1.000 | .872** | .812** | -0.425 | -.745** |
| **Sig. (2-tailed)** | | 0.070 | 0.029 | 0.522 | 0.831 | 0.026 | 0.147 | 0.876 | 0.001 | 0.041 | 0.002 | 0.006 | 0.725 | 0.583 |  | 0.000 | 0.000 | 0.062 | 0.000 |
| EPS/GAAP | | **Pearson Cor** | | 0.107 | 0.219 | .481* | 0.315 | 0.323 | 0.063 | 0.100 | .841** | .812** | .678** | 0.305 | -0.156 | 0.216 | .872** | 1.000 | .872** | -0.092 | -.674** |
| **Sig. (2-tailed)** | | 0.653 | 0.354 | 0.032 | 0.176 | 0.165 | 0.791 | 0.674 | 0.000 | 0.000 | 0.001 | 0.190 | 0.510 | 0.361 | 0.000 |  | 0.000 | 0.700 | 0.001 |
| TOTAL DEPOSITS | **Pearson Cor** | | | 0.220 | 0.412 | 0.404 | 0.218 | 0.423 | 0.193 | -0.119 | .863** | .611** | .595** | 0.369 | -.512* | .550* | .812** | .872** | 1.000 | -0.118 | -.903** |
| **Sig. (2-tailed)** | | | 0.352 | 0.071 | 0.077 | 0.355 | 0.063 | 0.415 | 0.617 | 0.000 | 0.004 | 0.006 | 0.109 | 0.021 | 0.012 | 0.000 | 0.000 |  | 0.621 | 0.000 |
| NON II/TA | | | **Pearson Cor** | -.460* | -.581** | .738** | .774** | -.779** | -.847** | -0.143 | -0.031 | 0.347 | -0.187 | -.946** | -0.189 | 0.194 | -0.425 | -0.092 | -0.118 | 1.000 | 0.340 |
| **Sig. (2-tailed)** | 0.041 | 0.007 | 0.000 | 0.000 | 0.000 | 0.000 | 0.548 | 0.898 | 0.133 | 0.431 | 0.000 | 0.426 | 0.412 | 0.062 | 0.700 | 0.621 |  | 0.142 |
| EFFICIENCY RATIO | | | **Pearson Cor** | -0.398 | -.597** | -0.173 | 0.008 | -.632** | -.498* | 0.131 | -.743** | -0.311 | -.614** | -.586** | .620** | -.633** | -.745** | -.674** | -.903** | 0.340 | 1.000 |
| **Sig. (2-tailed)** | 0.082 | 0.005 | 0.466 | 0.973 | 0.003 | 0.025 | 0.582 | 0.000 | 0.182 | 0.004 | 0.007 | 0.004 | 0.003 | 0.000 | 0.001 | 0.000 | 0.142 |  |
